# Supplementary material
Source: PubMed Central journal article supplement (PMC8649792)
Supplement: mmc1.pdf [file mmc1.pdf]

iScience, Volume 24

## **Supplemental information**

**The mRNA-LNP platform's lipid nanoparticle  
component used in preclinical vaccine  
studies is highly inflammatory**

**Sonia Ndeupen, Zhen Qin, Sonya Jacobsen, Aurélie Bouteau, Henri Estanbouli, and Botond  
Z. Igyártó**

**Figure S1**

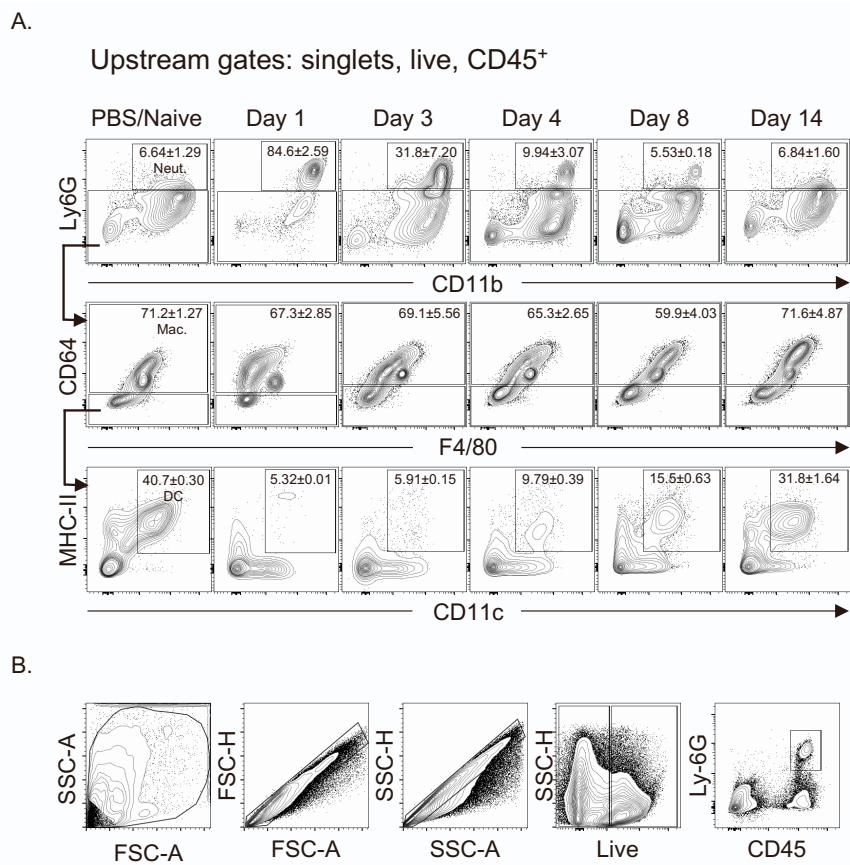

**Figure S1. Gating strategy for skin (A) and muscle (B) infiltrates data.** Related to Figure 1.

**Figure S2**

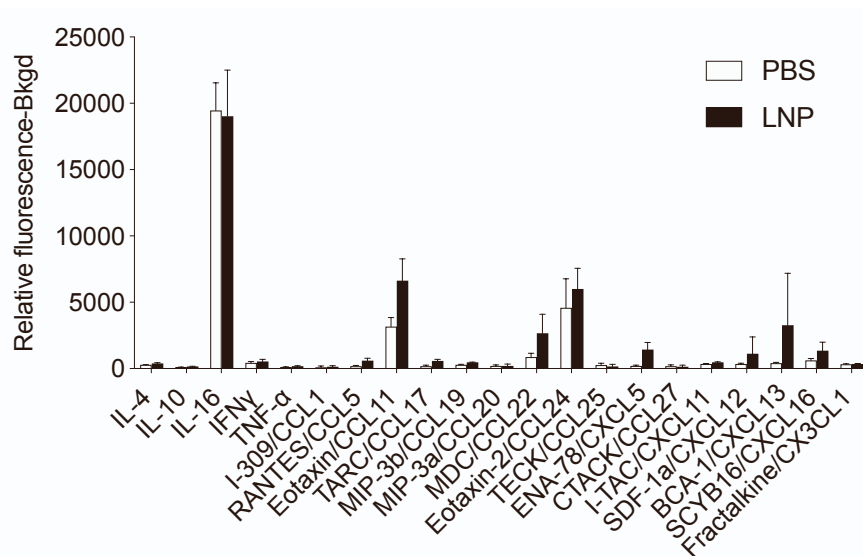

**Figure S2. Extended cytokine and chemokine panel.** Related to Figure 2.

**Figure S3.**

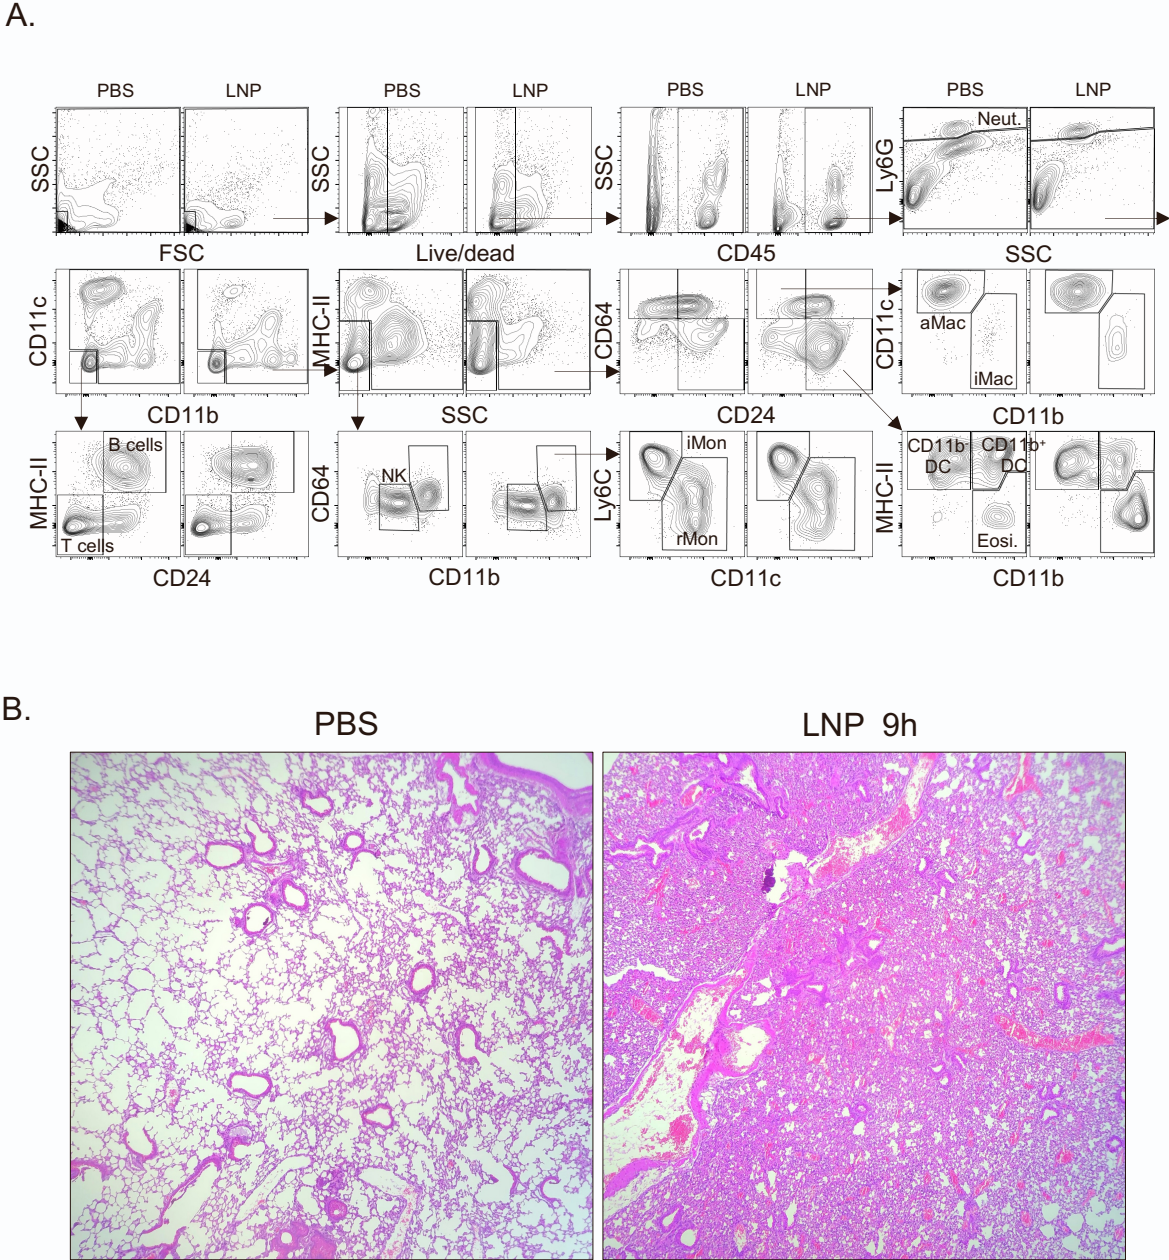

**Figure S3. (A) Gating strategy for lung leukocytes data. Related to Figure 3. (B). H&E stain of lungs harvested from PBS and 10  $\mu$ g LNP treated mice 9 hours post inoculation. Related to Figure 3.**
